# Supplementary material for: Transcriptomic Profiling of Gene Expression Associated with Granulosa Cell Tumor Development in a Mouse Model
Source: MDPI journal article supplement (doi:10.3390/cancers14092184), 2022-04-27
Supplement: s1 [file s1]

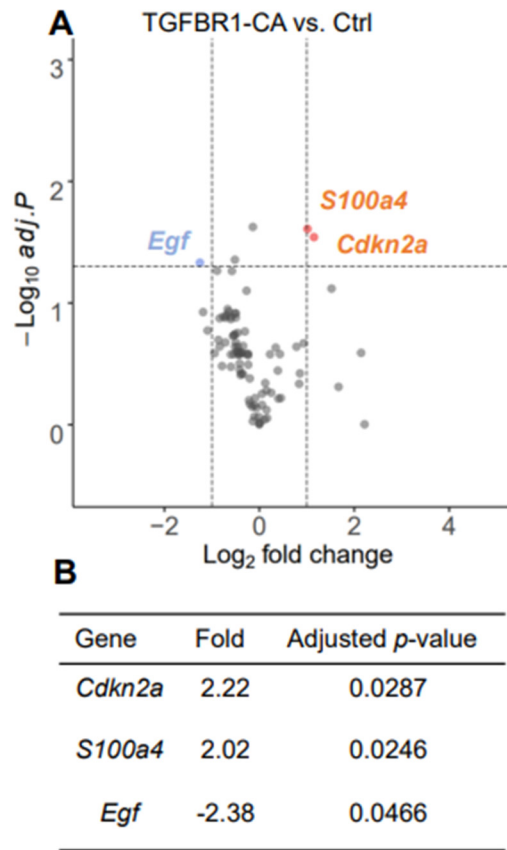

**Figure S1:** PCR profiler array analysis using ovaries from TGFBR1-CA and control mice. **(A)** Volcano plot showing the result of PCR profiler array using ovaries from TGFBR1-CA mice and age-matched controls at the age of 1 month. Three genes with fold changes  $> 2$  or  $< -2$  and adjusted *p*-values  $< 0.05$  were identified.  $n = 3$  per group. The figure was generated using EnhancedVolcano package in R. **(B)** Fold changes and adjusted *p*-values of DE genes identified by PCR profiler array.
