# Supplementary material for: Transcriptomic Profiling of Gene Expression Associated with Granulosa Cell Tumor Development in a Mouse Model
Source: MDPI journal article supplement (doi:10.3390/cancers14092184), 2022-04-27
Supplement: s1 [file s1]

- Mouse: *Smad1/5/8* mut vs. Ctrl
- Mouse: TGFBR1-CA vs. Ctrl

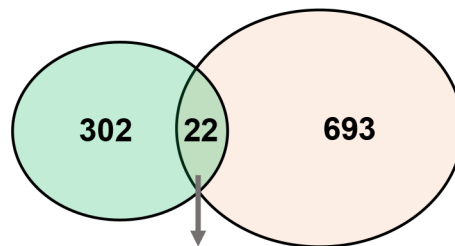

Co-upregulated genes

*Apoa1, C1qa, Cst12, Emilin1, Fbln5, Fstl1, Lrrc4, Mrvi1, Plscr2, Zfp423*

Co-downregulated genes

*Comp, Gabrb2, Hcn1, Lrp11, Masp1, Nppc, Rian, Slfn4, Srbd1*

**Figure S2.** Overlapping DE genes between TGFBR1-CA ovaries and *Smad1/5/8* mutant GCTs.
